# Supplementary material for: Fast profiling of metabolite mixtures using chemometric analysis of a speeded-up 2D heteronuclear correlation NMR experiment
Source: Royal Society of Chemistry journal article supplement (doi:10.1039/c7ra04032f), 2017-01-01

## Supporting Information

Fast profiling of metabolite mixtures using chemometric analysis of a speeded-up 2D heteronuclear correlation NMR experiment

Rakesh Sharma <sup>a</sup>, Navdeep Gogna <sup>a</sup>, Harpreet Singh <sup>a</sup>, and Kavita Dorai <sup>a‡</sup>

Department of Physical Sciences, Indian Institute of Science Education & Research (IISER) Mohali, Knowledge City, Sector 81 SAS Nagar, Punjab 140306 India

‡ E-mail: [kavita@iisermohali.ac.in](mailto:kavita@iisermohali.ac.in)

ST1- List of metabolites identified and used for metabolite fingerprinting in tea samples.

| Metabolite                                               | Chemical shift(ppm)<br>(multiplicity, J in Hz)                                        | Metabolite                       | Chemical shift(ppm)<br>(multiplicity, J in Hz)                                                             |
|----------------------------------------------------------|---------------------------------------------------------------------------------------|----------------------------------|------------------------------------------------------------------------------------------------------------|
| phytosterols                                             | 0.7(s), 2.02(m), 5.3(m)                                                               | malic acid                       | 2.37(dd,15.3,9.8), 2.63(dd,15.3,2.7), 4.27(dd,10.1,2.7)                                                    |
| <b>Lipids</b>                                            |                                                                                       | citric acid                      | 2.51(d,15.2), 2.67(d)                                                                                      |
| terminal methyl group<br>(CH <sub>2</sub> ) <sub>n</sub> | 0.89(t,6.9), 0.95(t,6.9)<br>1.27(m)                                                   | succinic acid                    | 2.52(s)                                                                                                    |
| CH <sub>2</sub> CH <sub>2</sub> COOH(C3)                 | 1.64(m)                                                                               | fumaric acid                     | 6.51(s)                                                                                                    |
| allylic protons of<br>unsaturated fatty acids            | 2.03(m)                                                                               | <b>Carbohydrates</b>             |                                                                                                            |
| CH <sub>2</sub> COOH(C2)                                 | 2.37(t,7.5)                                                                           | beta-glucose                     | 4.54(d,7.9)                                                                                                |
| olefinic protons of<br>unsaturated fatty acids           | 5.3(m)                                                                                | alpha-glucose                    | 5.16(d,3.1)                                                                                                |
| <b>Amino acids</b>                                       |                                                                                       | sucrose                          | 4.17(d,8.7), 5.4(d,3.8)                                                                                    |
| leucine                                                  | 0.95(t,6), 1.7(m)                                                                     | <b>Phenols and others</b>        |                                                                                                            |
| isoleucine                                               | 1.04, 1.98                                                                            | hesperidin                       | 1.08(dd), 2.78(ddd), 5.48(m), 6.90(m), 6.94(m)                                                             |
| valine                                                   | 0.98(d,7), 1.03(d,7),<br>2.29(m)                                                      | rutin                            | 1.12(d,6.2), 4.52(d,1.4), 5.11(d), 6.39(d,2.0), 7.62(d), 7.65(dd)                                          |
| alanine                                                  | 1.46(d,7.2)                                                                           | chlorogenic acid                 | 2.02(m), 2.17(m), 5.33(m), 6.4(d,15.9), 6.89(d,8.2), 7.11(dd), 7.2(d,1.6), 7.65(d,15.9)                    |
| arginine                                                 | 1.68(m), 1.90(m)                                                                      | naringenin                       | 2.74(dd), 3.02(dd), 5.36(dd), 5.88(d), 5.89(d), 6.8(m), 7.30(m)                                            |
| lysine                                                   | 1.71(m), 1.87(m)                                                                      | ferulic acid                     | 3.89(s), 6.36(d,15.97), 7.04(d,8.10), 7.15(m), 7.28(d,15.97)                                               |
| glutamic acid                                            | 2.02(m), 2.12(m), 2.44(m)                                                             | kaempferol/apigenin              | 6.2(d,2.1), 6.49(d,2.1), 6.9(m), 8.05(d,8.8)                                                               |
| glutamine                                                | 2.12(m), 2.44(m)                                                                      | caffeine                         | 3.22(s), 3.38(s), 3.77(s), 7.63(s)                                                                         |
| aspartic acid                                            | 2.75(dd,17.3,8.8),<br>2.85(dd,17.3,3.7)                                               | gallic acid                      | 7.07(s)                                                                                                    |
| cysteine                                                 | 3.06(m), 3.97(dd)                                                                     | theobromine                      | 7.84                                                                                                       |
| phenylalanine                                            | 3.19(m), 7.32(d,6.9),<br>7.37(m), 7.41(m)                                             | theanine                         | 1.10, 2.13, 2.37, 3.19, 3.72                                                                               |
| serine                                                   | 3.83, 3.95(m)                                                                         | choline                          | 3.22(s)                                                                                                    |
| tyrosine                                                 | 6.87(m), 7.19(m)                                                                      | myoinositol                      | 3.30                                                                                                       |
| histidine                                                | 7.09(d,0.8), 7.85(d,1.1)                                                              | <b>Found in Green tea</b>        |                                                                                                            |
| tryptophan                                               | 7.17(m), 7.24(m), 7.28(s),<br>7.53(d,8.1),<br>7.72(d,7.9)0.99(d,6.9)                  | epicatechin(EC)                  | 2.74, 2.89, 4.26, 4.81                                                                                     |
| <b>Organic acids</b>                                     |                                                                                       | epigallocatechin(EGC)            | 2.74, 2.89, 4.25, 4.87, 6.58                                                                               |
| priopionic acid                                          | 1.04(t,7.6), 2.14(q,7.6)                                                              | epicatechin-3-gallate(EGC)       | 2.89, 3.03, 5.09, 5.50, 6.03, 6.78, 6.88, 6.99                                                             |
| lactic acid                                              | 1.31(d,6.8), 4.08(q,6.9)                                                              | epigallocatechin-3-gallate(EGCG) | 2.89, 3.03, 5.03, 5.50, 6.03, 6.59, 6.95                                                                   |
| quinic acid                                              | 1.84(dd), 1.94(m), 2.05(m),<br>2.1(dddd), 3.54(dd,9.2,3.2),<br>4.04(dd), 4.16(q,3.4), | <b>Found in Black tea</b>        |                                                                                                            |
| acetic acid                                              | 1.96(s)                                                                               | theaflavin                       | 2.74(d,17.1), 2.75(d,17), 2.86(dd,17,4.5), 2.87(dd,17.1,5.9), 4.21, 4.29, 5.41, 6.01-6.13, 6.86, 7.02,7.15 |
|                                                          |                                                                                       | thearubigin                      | 1.88, 1.98, 2.05, 2.08, 3.54, 3.62, 4.02, 4.14, 6.04-6.13, 6.85, 7.03, 7.16                                |

**ST2-Post-hoc** analysis showing the metabolites responsible for differentiation between green and black tea samples, given the  $p$  value threshold of 0.05.

| ppm         | p-value    | $-\log_{10}(P)$ | FDR        |
|-------------|------------|-----------------|------------|
| theobromine | 2.4296E-14 | 13.6148         | 2.8499E-12 |
| EC          | 7.4349E-12 | 11.129          | 5.4771E-10 |
| thearubigin | 8.0795E-11 | 10.093          | 3.5711E-9  |
| cysteine    | 1.2679E-10 | 9.8969          | 4.6702E-09 |
| caffeine    | 4.54E-09   | 8.3429          | 9.12E-08   |
| isoleucine  | 6.82E-09   | 8.166           | 1.26E-07   |
| aspartate   | 2.31E-08   | 7.6362          | 3.19E-07   |
| hesperidin  | 5.78E-08   | 7.2379          | 7.10E-07   |
| ECG         | 1.18E-07   | 6.9297          | 1.30E-06   |
| glucose     | 2.47E-07   | 6.607           | 2.37E-06   |
| valine      | 1.48E-06   | 5.8291          | 1.08E-05   |
| alanine     | 2.62E-06   | 5.5811          | 1.61E-05   |
| sucrose     | 3.11E-05   | 4.5071          | 0.00015278 |
| EGCG        | 3.43E-05   | 4.4644          | 0.00016141 |
| lipids      | 0.0032136  | 2.49            | 0.0076514  |
| theanine    | 0.0060433  | 2.2187          | 0.01272    |
| theaflavin  | 0.02459    | 1.6092          | 0.0418     |
| leucine     | 0.016211   | 1.79211         | 0.0288     |

**S1-** 2D ASAP-HSQC spectrum for green tea, number of scans = 1 and total experimental time = 49 sec.

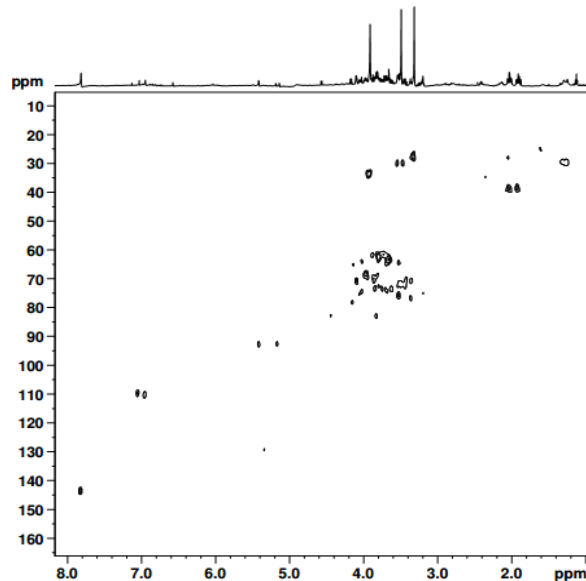

S2- 2D ASAP-HSQC spectrum for green tea, number of scans = 2 and total experimental time = 1 min 33 sec.

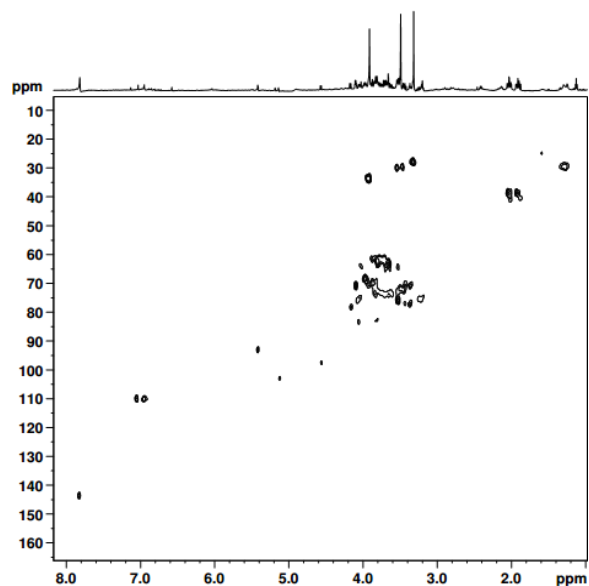

S3- 2D ASAP-HSQC spectrum for green tea, number of scans = 4 and total experimental time = 2 min 58 sec.

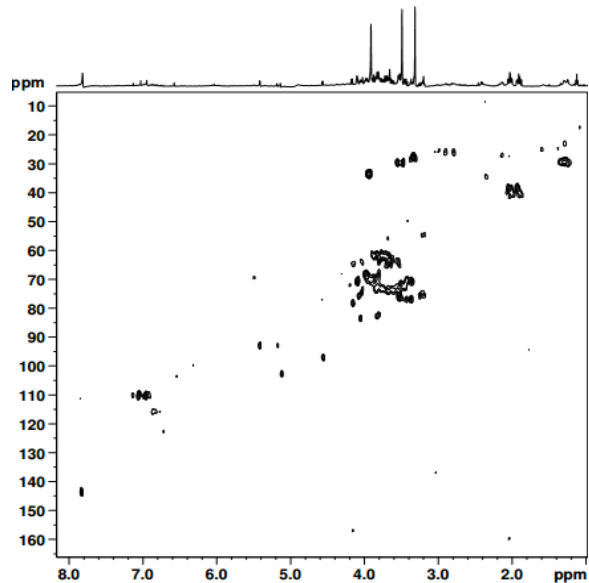

S4- 2D ASAP-HSQC spectrum for green tea, number of scans = 6 and total experimental time = 4 min 24 sec.

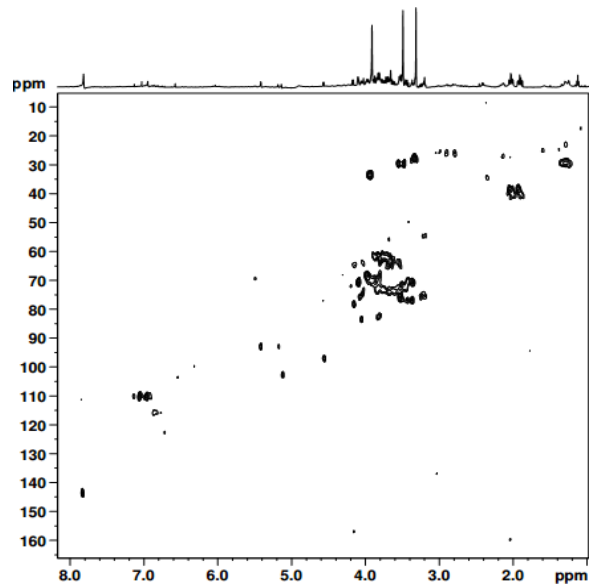

S5- 2D ASAP-HSQC spectrum for green tea, number of scans = 8 and total experimental time = 5 min 49 sec.

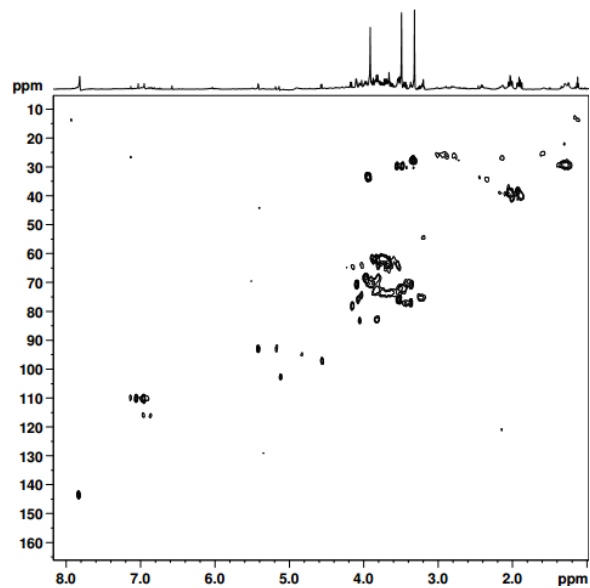

S6- Extrapolation of peak heights measured from 600 MHz 2D HSQC<sub>i</sub> (i=1,2) spectra for different peaks

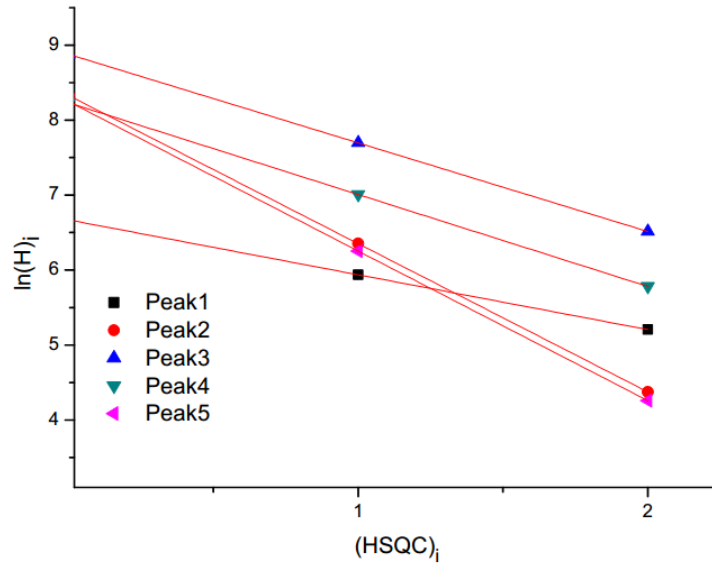

S7- Extrapolation of peak heights measured from 600 MHz 2D ASAP-HSQC<sub>i</sub> (i=1,2) spectra for different peaks

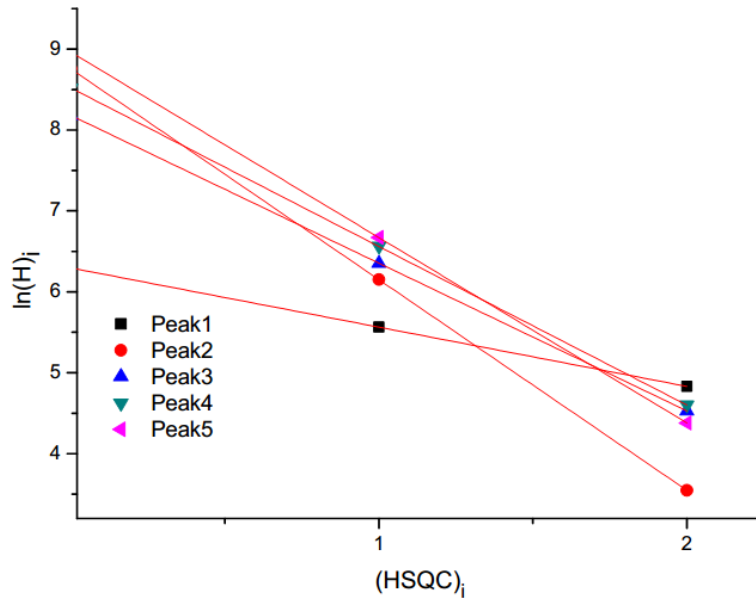

Supplement: c7ra04032f1.pdf [file c7ra04032f1.pdf]
